# Supplementary material for: Effects of whole-grain barley and oat β-glucans on postprandial glycemia and appetite: a randomized controlled crossover trial
Source: Royal Society of Chemistry journal article supplement (doi:10.1039/d2fo01717b), 2022-01-01
Supplement: d2fo01717b1.pdf [file d2fo01717b1.pdf]

### Supplementary Data

**Article title:** Effects of whole-grain barley and oat  $\beta$ -glucans on postprandial glycaemia and appetite:  
a randomized controlled crossover trial

**Journal name:** Food & Function

**Authors' names:** Zeynep Caferoglu<sup>1,\*</sup>, Gizem Aytekin Sahin<sup>1</sup>, Zafer Gonulalan<sup>2</sup>, Nihal Hatipoglu<sup>3</sup>

<sup>1</sup>Erciyes University, Faculty of Health Sciences, Department of Nutrition and Dietetics, Kayseri,  
Turkey

<sup>2</sup>Erciyes University, Faculty of Veterinary Medicine, Department of Food Hygiene and Technology,  
Kayseri, Turkey

<sup>3</sup>Erciyes University, Faculty of Medicine, Department of Internal Medical Sciences, Kayseri, Turkey

\*Corresponding author's e-mail address: [zcaferoglu@erciyes.edu.tr](mailto:zcaferoglu@erciyes.edu.tr)

**Supplemental Table S1.** Ingredients in the test breads.

| <b>Ingredients</b><br><b>(Based on 100 g flour)</b> | <b>WB</b> | <b>WWB</b> | <b>BB</b> | <b>OB</b> |
|-----------------------------------------------------|-----------|------------|-----------|-----------|
| White flour                                         | 100 g     | -          | -         | -         |
| Whole-wheat flour                                   | -         | 100 g      | -         | -         |
| Barley flour                                        | -         | -          | 100 g     | -         |
| Oat flour                                           | -         | -          | -         | 100 g     |
| Dry yeast                                           | 2 g       | 2 g        | 2 g       | 2 g       |
| Sugar                                               | 4 g       | 4 g        | 4 g       | 4 g       |
| Salt (NaCl)                                         | 2 g       | 2 g        | 2 g       | 2 g       |
| Sunflower oil                                       | 4 g       | 4 g        | 4 g       | 4 g       |
| Water                                               | 60 g      | 75 g       | 75 g      | 75 g      |

Abbreviations: BB, barley bread; OB, oat bread, WB, white bread; WWB, whole-wheat bread.

**Supplemental Table S2.** Nutritional composition of component foods in the standard breakfast

| <b>Foods</b>   | <b>Portion size</b> | <b>Energy</b> | <b>Carbohydrate</b> | <b>Protein</b> | <b>Fat</b> | <b>Fibre</b> |
|----------------|---------------------|---------------|---------------------|----------------|------------|--------------|
|                | <b>(g)</b>          | <b>(kcal)</b> | <b>(g)</b>          | <b>(g)</b>     | <b>(g)</b> | <b>(g)</b>   |
| Feta cheese    | 15                  | 34.8          | 0.7                 | 1.8            | 2.7        | <0.01        |
| Cheddar cheese | 24                  | 79.2          | 0.5                 | 5.3            | 6.2        | <0.01        |
| Olive          | 24                  | 57.1          | 0.3                 | 0.3            | 4.8        | <0.01        |
| Honey          | 20                  | 64            | 16.6                | 0.06           | <0.01      | <0.01        |
| Black tea      | 150 ml              | -             | -                   | -              | -          | -            |

**Supplemental Table S3.** All foods served at the buffet-style lunch (per 100 g)

| <b>Foods</b>                                | <b>Energy (kcal)</b> | <b>Carbohydrate (g)</b> | <b>Protein (g)</b> | <b>Fat (g)</b> | <b>Fibre (g)</b> |
|---------------------------------------------|----------------------|-------------------------|--------------------|----------------|------------------|
| Meatballs                                   | 196                  | 9.6                     | 14.8               | 11             | 1                |
| Tuna                                        | 169                  | <0.01                   | 22.6               | 8.7            | <0.01            |
| Pasta with tomato<br>sauce                  | 281                  | 56                      | 10.4               | 1.2            | 4.8              |
| Yogurt                                      | 54                   | 6.2                     | 4                  | 1.5            | <0.01            |
| Salad (iceberg, red<br>cabbage, and carrot) | 21                   | 3.5                     | 1.2                | 0.2            | 2.2              |
| White bread                                 | 276                  | 50.1                    | 9.4                | 3.2            | 4.3              |
| Apple                                       | 58                   | 11.9                    | 0.3                | 0.6            | 1.9              |
| Banana                                      | 79                   | 18.1                    | 0.6                | 0.1            | 1.7              |
| Fruit juice                                 | 25                   | 6.3                     | <0.01              | <0.01          | <0.01            |
| Yogurt drink                                | 43                   | 3.5                     | 2                  | 2.3            | <0.01            |

**Supplemental Table S4.** Participants' dietary intake and physical activity level before each test meal

| <b>Variables<sup>a</sup></b>   | <b>WB</b> | <b>WWB</b> | <b>BB</b> | <b>OB</b> | <b>p<sup>*</sup></b> |
|--------------------------------|-----------|------------|-----------|-----------|----------------------|
| Energy (kcal) <sup>b</sup>     | 1868±503  | 1889±442   | 1958±495  | 1973±560  | 0.730                |
| Carbohydrate (%) <sup>b</sup>  | 45.3±7.4  | 47.8±11.6  | 45.3±7.4  | 43.1±8.1  | 0.319                |
| Protein (%) <sup>b</sup>       | 15.4±2.6  | 16.3±3.4   | 15.3±3.9  | 16.3±3.9  | 0.664                |
| Fat (%) <sup>b</sup>           | 39.3±6.8  | 35.9±10.5  | 39.5±6.2  | 40.5±6.6  | 0.198                |
| Dietary fibre (g) <sup>b</sup> | 18.0±5.3  | 22.0±9.1   | 19.1±9.7  | 20.9±10.8 | 0.337                |
| Total MET (min/week)           | 1459±1022 | 1247±989   | 1556±1108 | 1399±968  | 0.131                |

Abbreviations: BB, barley bread; MET, metabolic equivalent task; OB, oat bread, WB, white bread; WWB, whole-wheat bread.

<sup>a</sup>Values were expressed as mean ± SD (n=20).

<sup>b</sup>Determined from the 24-hours dietary recalls using BeBiS Nutrition Database software version 8.2.

\*p<0.05 by the ANOVA for repeated measures.



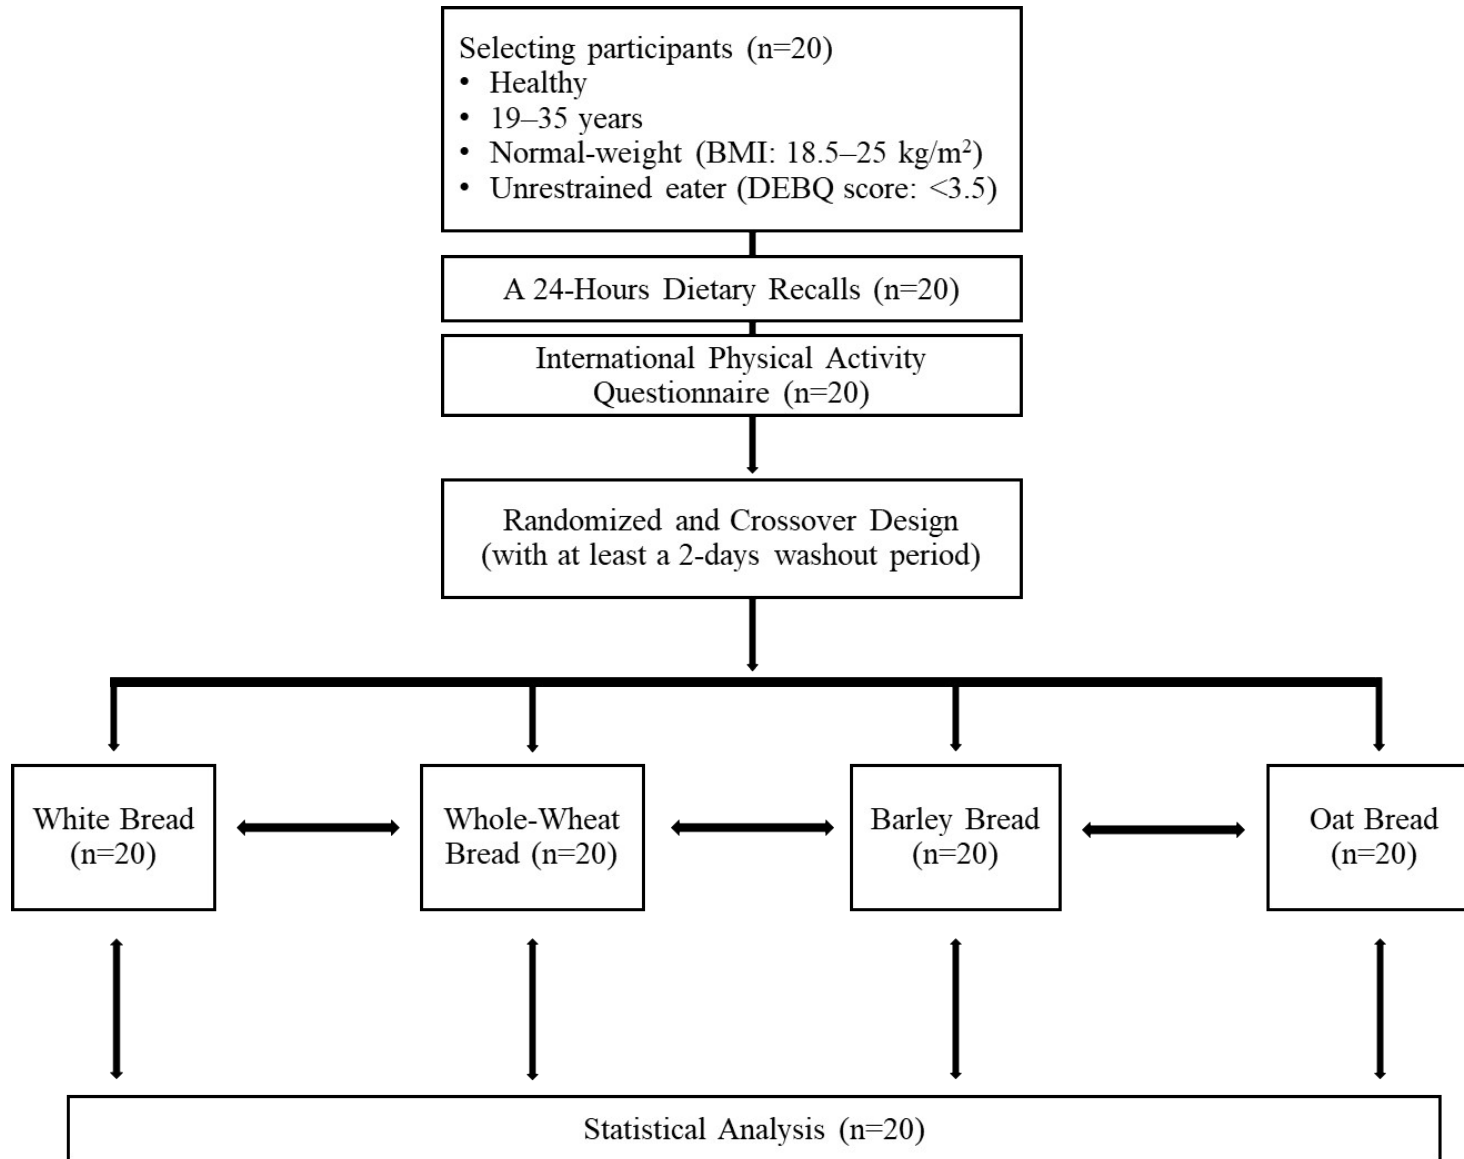

**Supplemental Fig. S1.** Participant recruitment flow diagram. BMI, body mass index; DEBQ, Dutch Eating Behaviour Questionnaire.

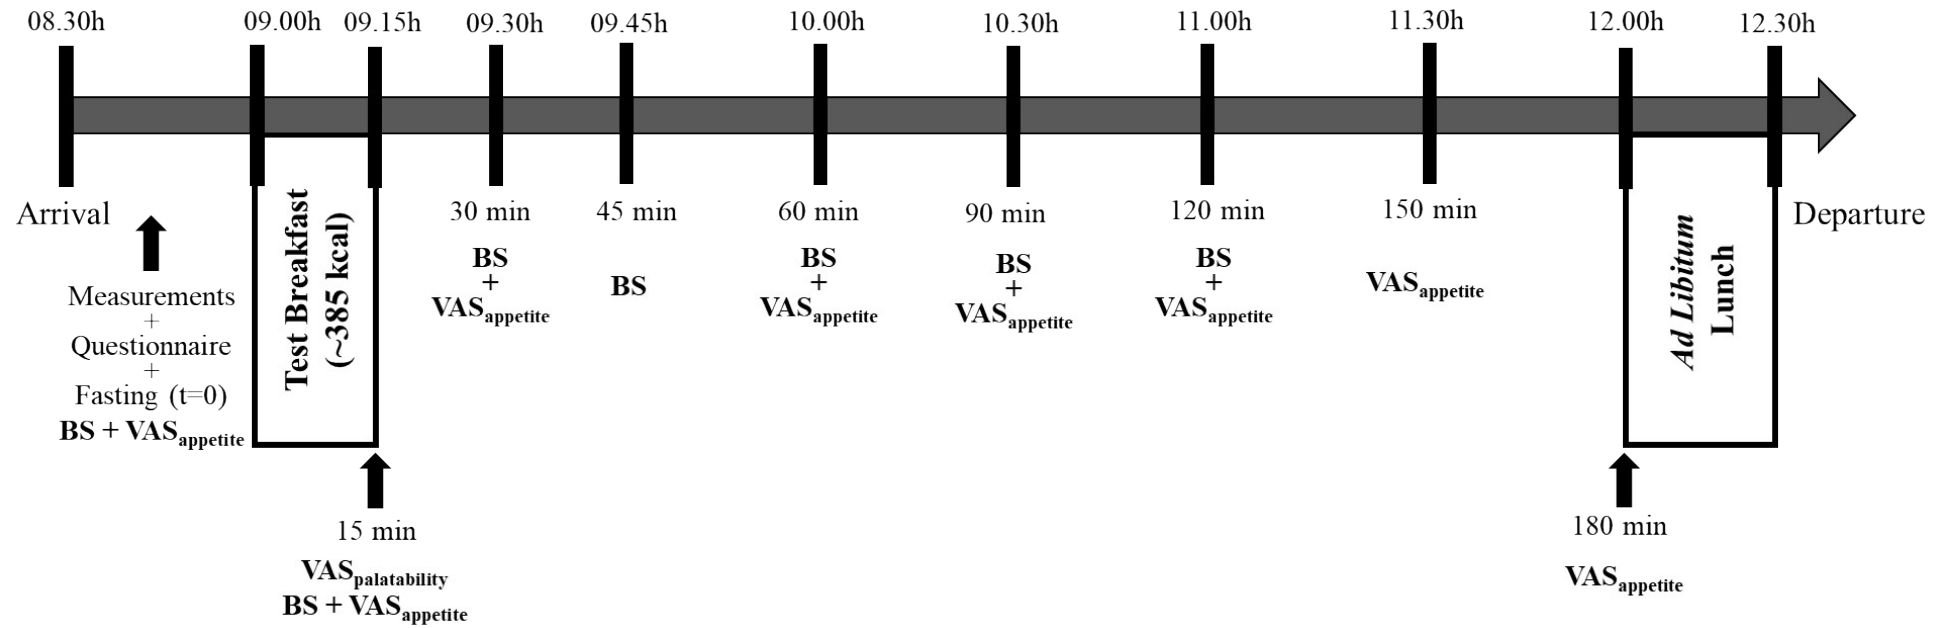

**Supplemental Fig. S2.** Study protocol and timeline on test days. BS, blood samples; VAS, visual analogue scale.
